# Supplementary material for: The In-Vitro Antitumor Effects of AST-3424 Monotherapy and Combination Therapy With Oxaliplatin or 5-Fluorouracil in Primary Liver Cancer
Source: Frontiers journal article supplement (doi:10.3389/fonc.2022.885139), 2022-07-22
Supplement: Data_Sheet_1.pdf [file Data_Sheet_1.pdf]

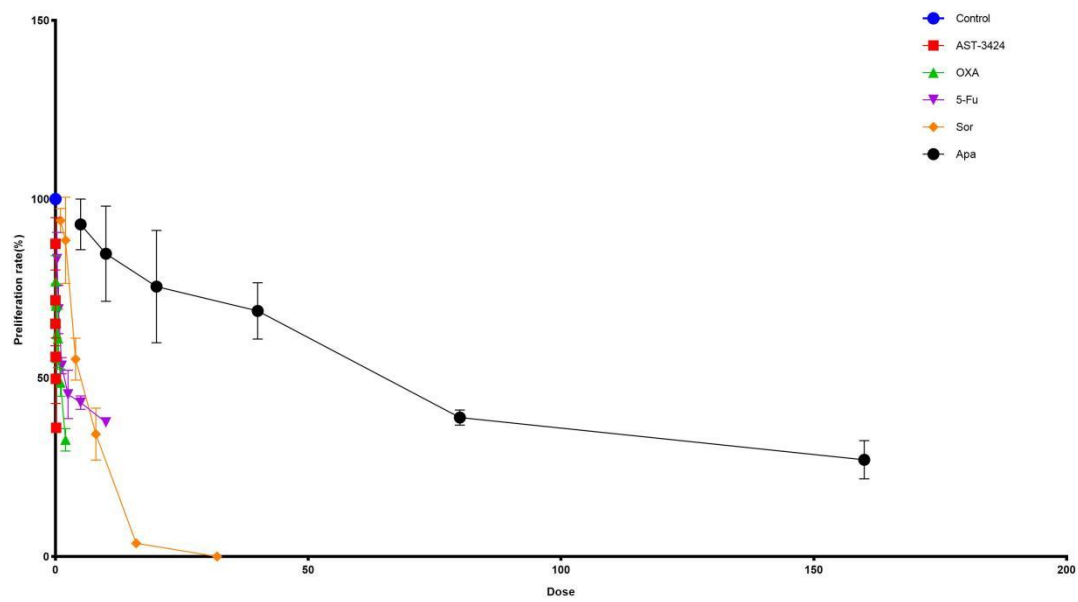

FIGURE | The effect at different concentrations of AST-3424(0.005-0.16  $\mu$ M), OXA (0.0625-2 $\mu$ g/mL), 5-Fu(0.3125-10  $\mu$ g/mL), Sor(1-32  $\mu$ g/mL) and Apa(5-160  $\mu$ g/mL) treated for 48 h in HepG2 cells. All data are expressed as the mean  $\pm$  SEM of three separate experiments.

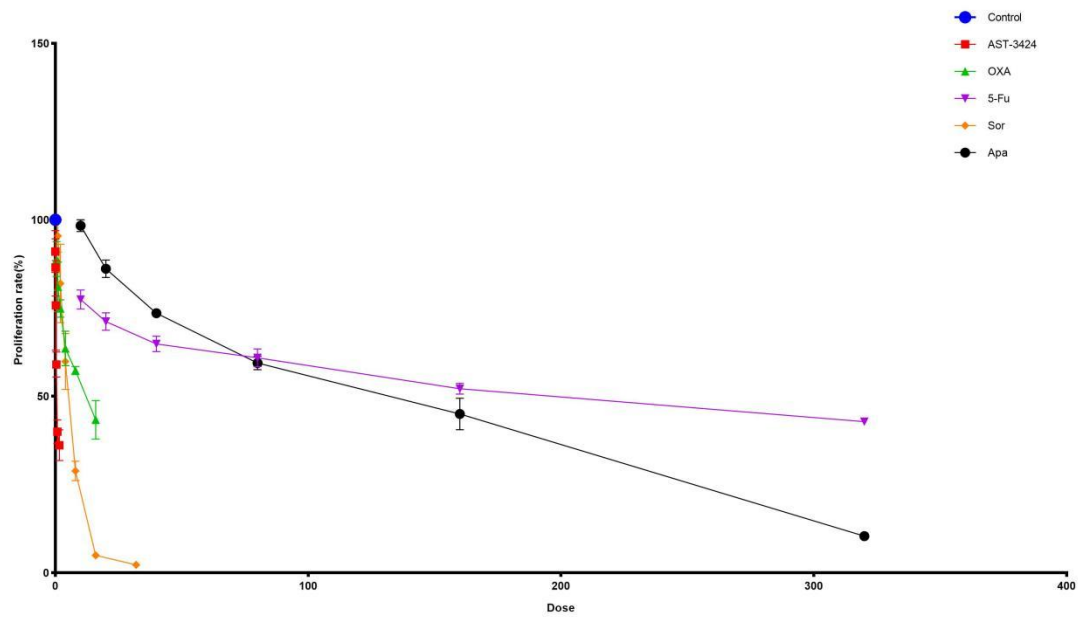

FIGURE | The effect at different concentrations of AST-3424(0.05-1.6  $\mu$ M), OXA (0.5-16 $\mu$ g/mL), 5-Fu(10-320  $\mu$ g/mL), Sor(1-32  $\mu$ g/mL) and Apa(10-320  $\mu$ g/mL) treated for 48 h in PLC/PRF/5 cells. All data are expressed as the mean  $\pm$  SEM of three separate experiments.

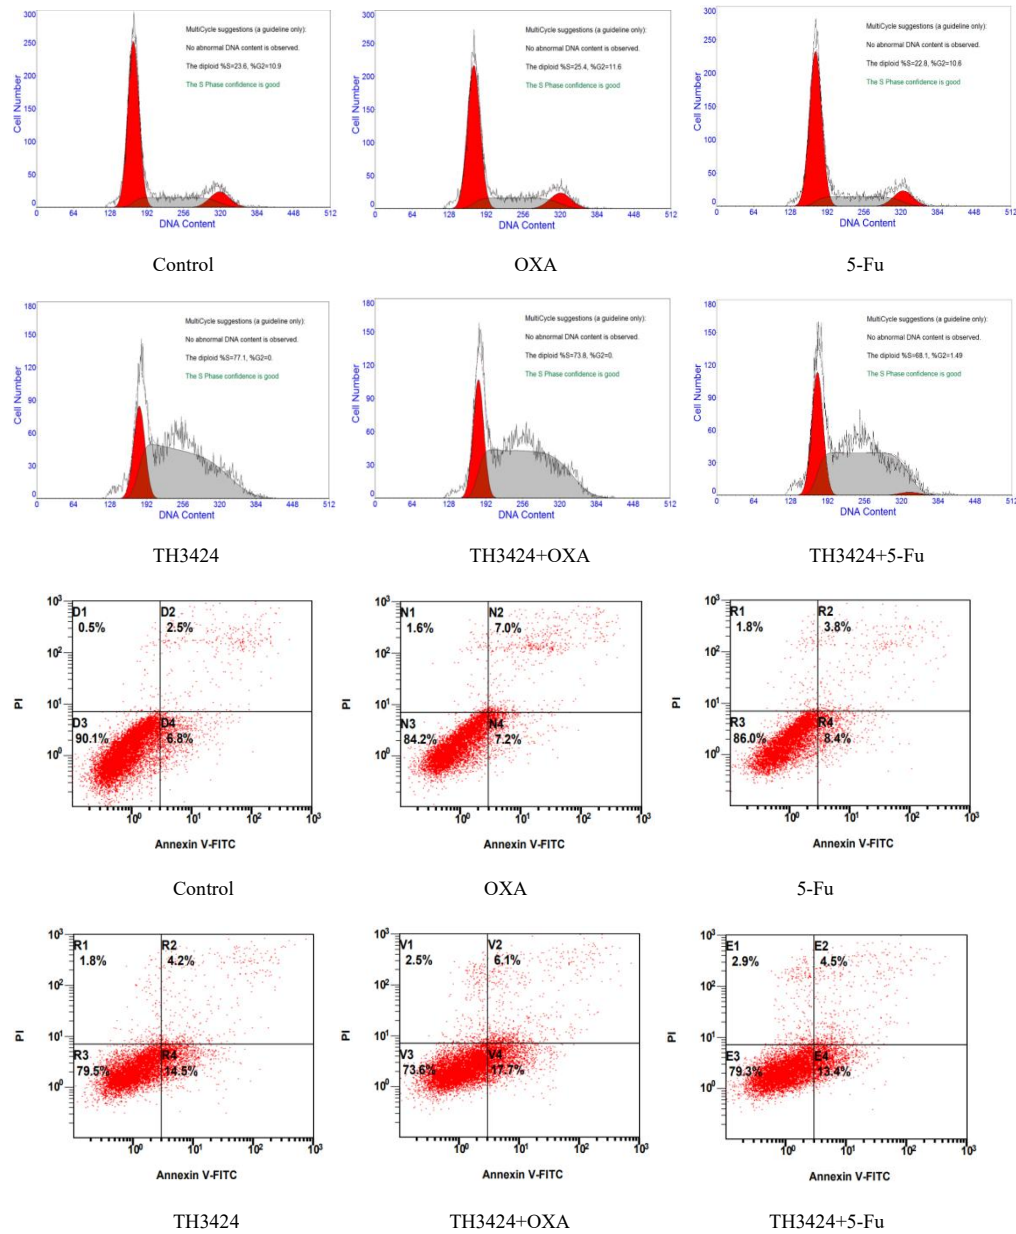

(a) DNA content-based cell cycle of HepG2 cells after TH3424(0.05 $\mu$ M), OXA(0.02 $\mu$ g/ml) and 5-Fu(0.3125 $\mu$ g/ml) alone or in combination treatment were analyzed using Flow cytometry.(b) Percentage of cells in S phases of HepG2 cells after TH3424(0.05 $\mu$ M), OXA(0.02 $\mu$ g/ml) and 5-Fu(0.3125 $\mu$ g/ml) alone or in combination treatment. (c) Flow cytometry histograms of HepG2 cells after 48h treatment with TH3424(0.05 $\mu$ M), OXA(0.02 $\mu$ g/ml) and 5-Fu(0.3125 $\mu$ g/ml) alone or in combination, the samples were detected using AV/PI double-staining method.
